# Supplementary material
Source: PubMed Central journal article supplement (PMC3629846)
Supplement: Supp_Fig2.pdf [file Supp_Fig2.pdf]

**A**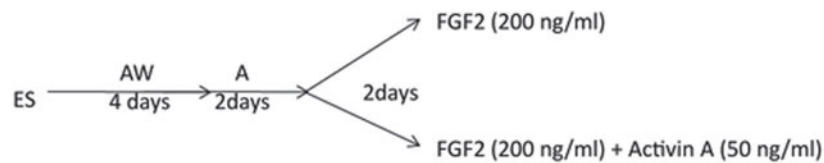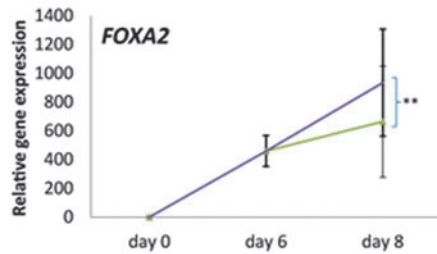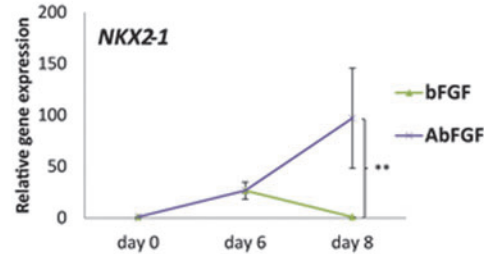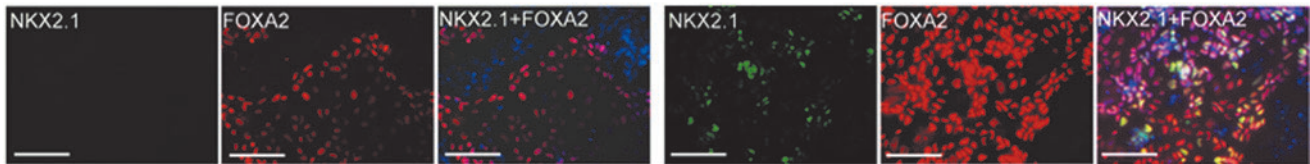**B**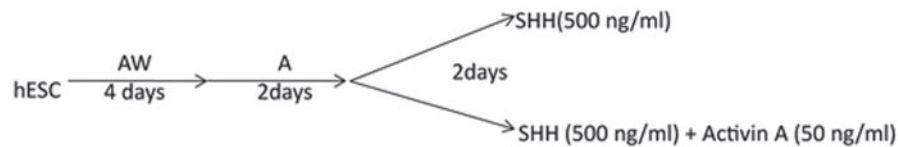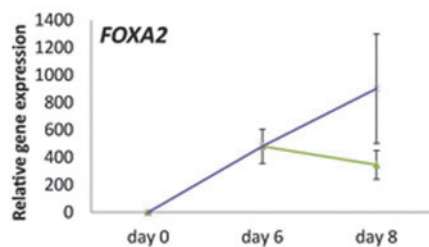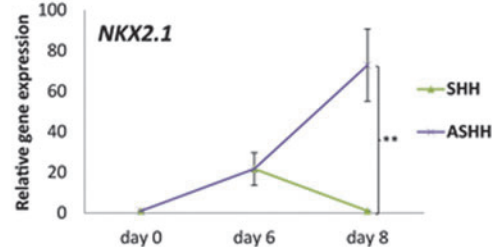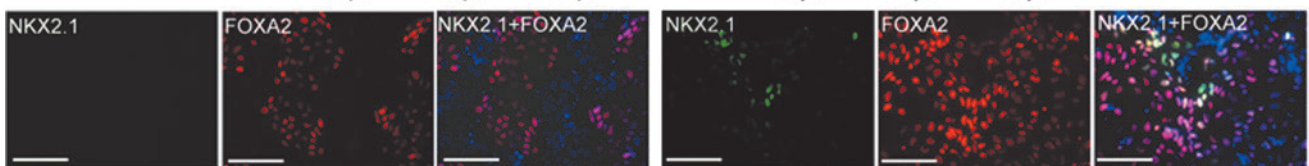

**SUPPLEMENTARY FIG. S2.** Neither Fibroblast growth factor-2 (FGF2), sonic hedgehog (SHH) or BMP4 induce NKX2-1; while GDF11 has similar NKX2-1 induction capacity as Activin-A. **(A–C)** NKX2-1 and FOXA2 expression in hESC-H9 progeny cultured for 4 days with Activin-A + Wnt3a, 2 days with Activin-A followed by FGF2, SHH or BMP4. All data are expressed as mean  $\pm$  SEM of different experiments. (\* $P$  < 0.05; \*\* $P$  < 0.01). Scale bar, 100  $\mu$ m. **(A)** 2 additional days with FGF2 alone or combined with Activin-A ( $n$  = 6): Percentage FOXA2 positive cells: FGF2 = 76.6%  $\pm$  16.6%, AFGF2: 84.1%  $\pm$  7.4%; Percentage NKX2-1 positive cells: 0% in FGF2 condition, and 10%  $\pm$  9.4% in AFGF2. **(B)** 2 additional days of SHH alone or combined with Activin-A ( $n$  = 4): Percentage FOXA2 positive cells: SHH = 64.0%  $\pm$  11.3%, ASHH: 73.2%  $\pm$  14.8%; Percentage NKX2-1 positive cells: 0% in SHH condition, and 10.1%  $\pm$  9% in ASHH. **(C)** 2 additional days of BMP4 alone combined with Activin-A ( $n$  = 5): Percentage FOXA2 positive cells: BMP = 70.1%  $\pm$  10.1%, ABMP: 71.1%  $\pm$  18.2%; Percentage NKX2-1 positive cells: 0% in BMP condition, 9.9%  $\pm$  7.8% in ABMP. **(D)** NKX2-1 and FOXA2 expression in hESC-H9 progeny cultured for 4 days with GDF11 + Wnt3a, and 4 days of GDF11 alone ( $n$  = 3). Scale bar, 100  $\mu$ m. Percentage FOXA2 positive cells 72.4%  $\pm$  15.8%; Percentage NKX2-1 positive cells: 4.3%  $\pm$  2.6%. ASHH, Activin A + SHH; ABMP, Activin A + BMP.

**C**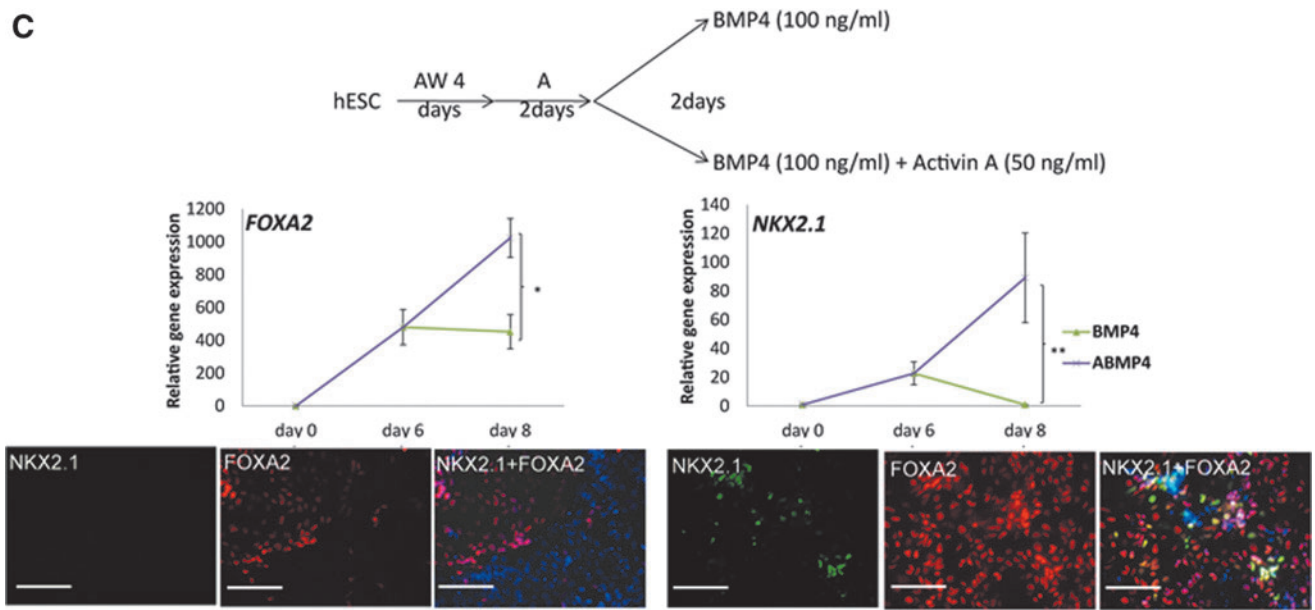**D**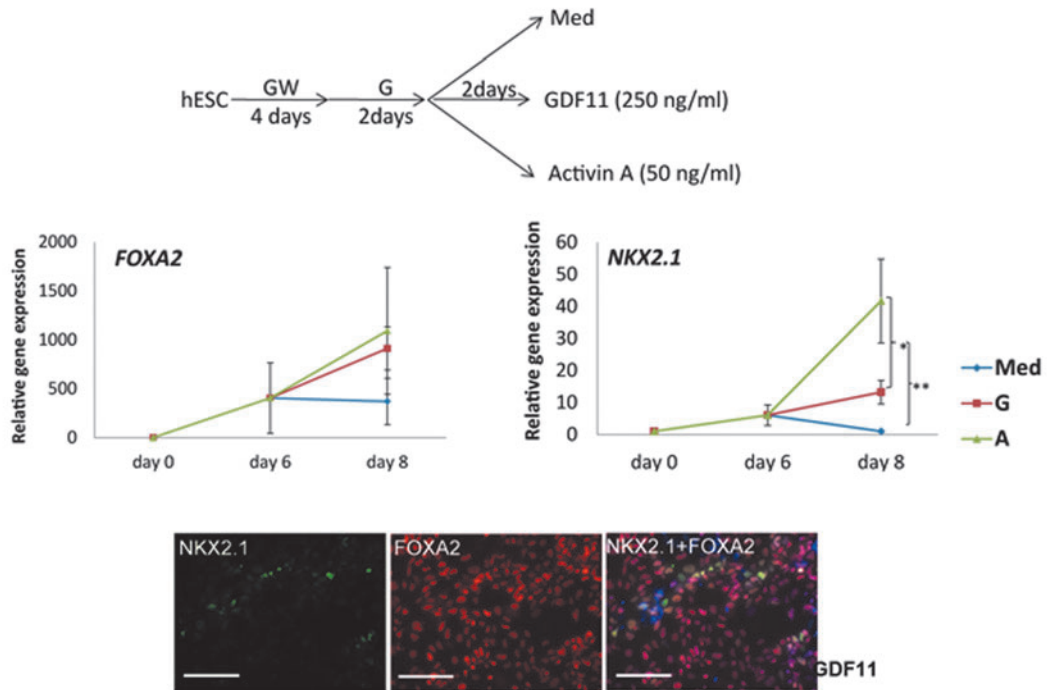

SUPPLEMENTARY FIG. S2. (Continued).
