# Supplementary material
Source: PubMed Central journal article supplement (PMC3629846)
Supplement: Supp_Fig3.pdf [file Supp_Fig3.pdf]

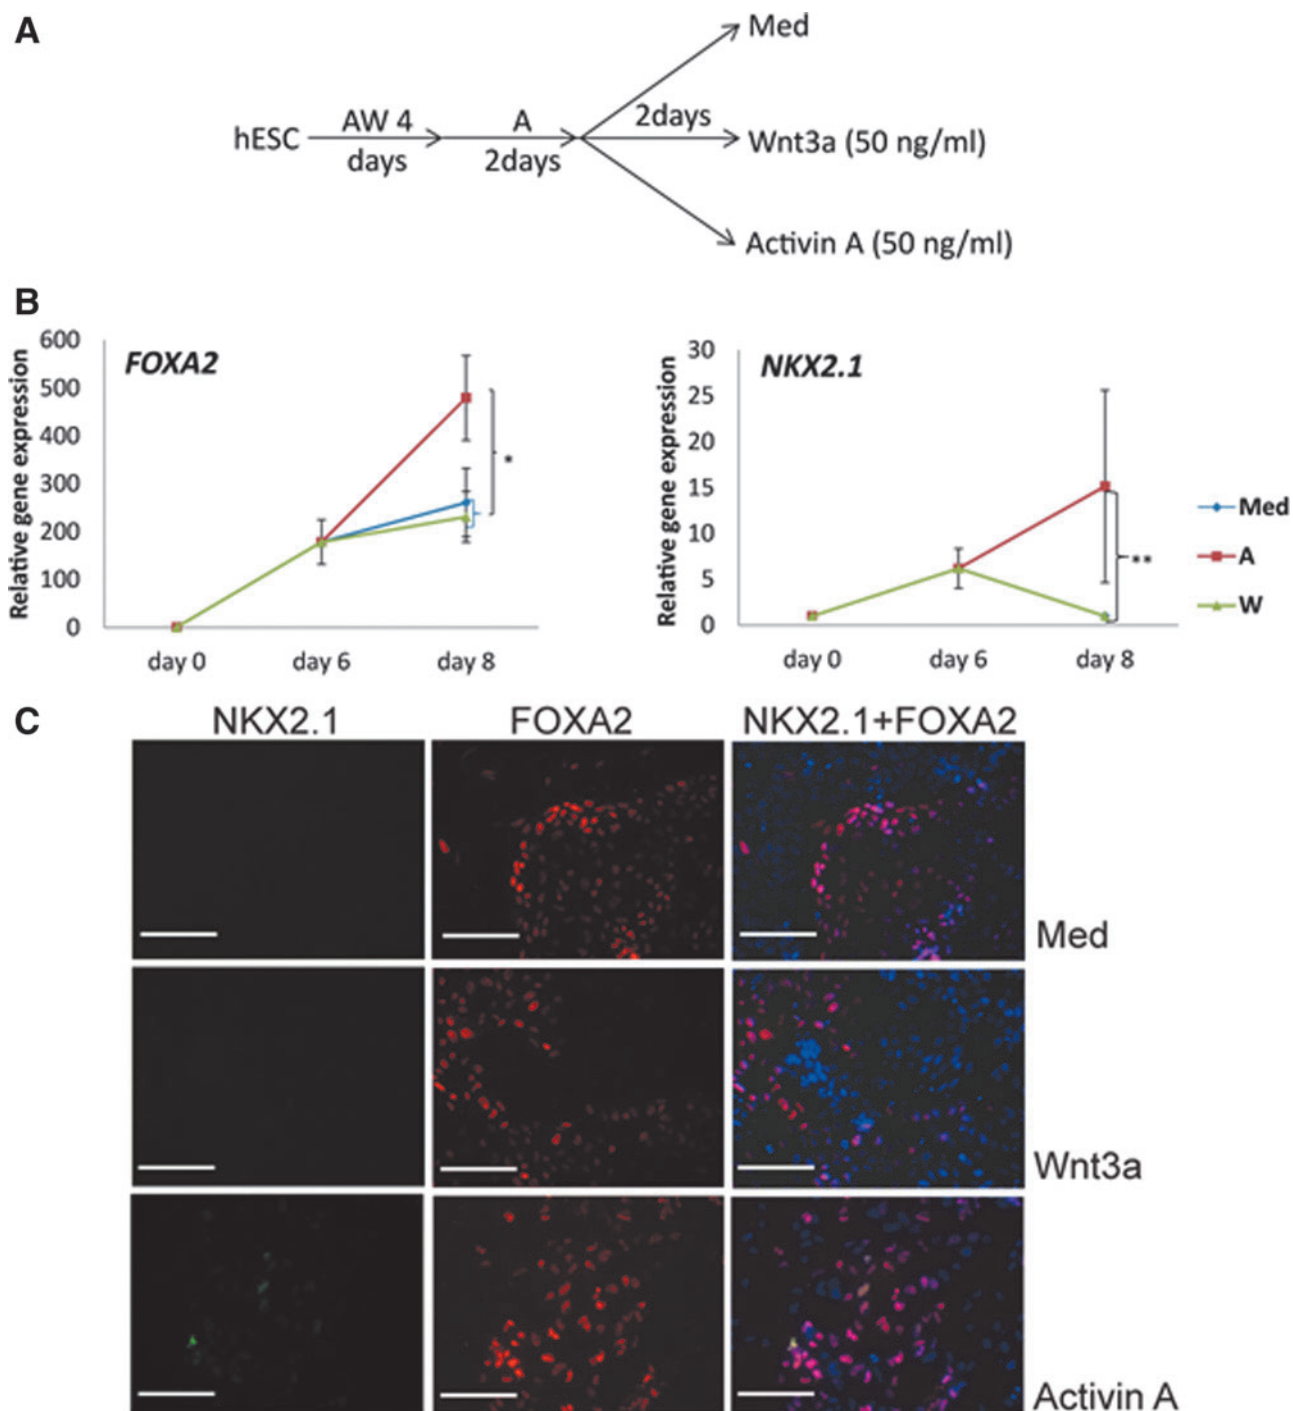

**SUPPLEMENTARY FIG. S3.** Activin-A induces expression of NKX2-1 in hESC-H1 cells. **(A)** Differentiation scheme. **(B)** qRT-PCR measurement of *FOXA2* and *NKX2-1* transcript levels. Data are represented as mean  $\pm$  SEM from 5 independent experiments. (\* $P < 0.05$ ; \*\* $P < 0.01$ ). **(C)** Immunofluorescence for FOXA2 with NKX2-1. Percentage FOXA2 and NKX2-1 positive cells in cultures supported with Activin-A from d6–8  $71.2\% \pm 19.9\%$  and  $4.1\% \pm 3.3\%$ , respectively; Percentage FOXA2 and NKX2-1 positive cells in cultures supported with Wnt3a from d6–8  $68.3\% \pm 14\%$  and  $0\%$ , respectively, Scale bar, 100  $\mu\text{m}$ .
