# Supplementary material
Source: PubMed Central journal article supplement (PMC3629846)
Supplement: Supp_Fig4.pdf [file Supp_Fig4.pdf]

cagct**AAGGAGAAAGCAAAACAAAACAAT**gataaaaacgtttaaaatccaaggacaaaaaccggagtctg  
gtctcaaaatccgcgccgttcagtgtctcactcggtagctcactcggctcagggcccggcctggccggagcaacgcggg  
ggacacccccgattccgctggggagcgcagcccacagctccccctcgcagggcggccaaggaccctcaaggcggggg  
cccacactgaagcctgggaacgcgcagacagaaaccctctcctcaagcagtttctgctcgtcggatgagaggcgc  
ccaattgaagcagaatgatcctcatctactaatatccagcgtggccacaaagcactggccatttacgccaccactttaa  
caaagatatttggttattcccgggaagcaagagcacttttgcattggctgagctcggggcggaggcgcagcctcggcccagc  
ctcccggcctgagctgcccgcactcggcattcggcccctcctggccagcgtccagccgcccgggggttcaggctcagtt  
ccggccggcaacagacagacgggactcacgccctcctgctcgcgcgtccctgaagcatcagaggggaaaacagc  
gtggctctgggctcgggtgctggggctgtgatgtcctcggaaagtcaactccagccccagatccccgcgtgtctgggagat  
gggaggggtcagggacaccaggtttgttcaggtggggcaactcagtgacggaccctcccgtgagaccccttccatc  
ctcccagctctggggccagtgctgtgttctcggccgggggtgggggggggggggaagaccttgggggagggcgtgt  
tagcgggggtggccactgaaaaaccctgagctcggggggcgggttggctcgggga**tccgggacagcctccggg**  
aggcagtcgatcccactcagcgcctccgcccgtcggattctcctcggtagggggaaagggggcggggagcaga  
gg**TGTC**cctctgacggcggcagaagagagg**CAGACAGACTgaCAGAC**acgt**AGAC**caacagtgcggcccca  
gggttcgtccc**CAGACT**cgtcgtcattgttggcgactggggctcagcgcagcgaagccc**atgtgtcggaggca**  
gtgggaaggcgcggggctgggaggccgcggcgggaggaggagcagccccggcaggtcaggtgaaacccccacct  
gtccctcagccccctcctctaaagacctgtccgtgccggggaaccccaccgaattgaaagtggttccactttgtaact  
ccgcaagttggtgcaaagcagcattcaccttctcctcaaccatctcctcctctgttactccccacccacctctg  
ccctccccgctctcggttccctcctcctccctccctccacctcctccccgcgtccgctggtacccccaaaaaatgggg  
gtgggggtgtccaaggagggggggaaatgcttgggtctcgtctcgtcctcctcctctctttagacacataaaatcctg

acaagtgaac **T**(+1)taa

Deletion control: aaggagaaagcaaaacaaaaacaat (-1590/-1566)

Deletion1 : **GACAGACTgaCAGAC**acgt**AGAC**ca (-538/-514)

Deletion2: **AGAC**acgt**AGAC** (-527/-516)

Mutation control:gg**tg**tccc (-570/-563)

gg**ct**gtccc

Mutation1: ga**CAGAC**acgt**AGAC** (-530/-516)

ga**GCTTCT**cg**CTTC**

Mutation2: g**CAGACAGACTgaCAGAC**acgt**AGAC** (-541/-516)

g**TGCCTTGACTgaGCTTCT**cg**CTTC**

Mutation3: g**CAGACAGACTgaCAGAC**acgt**AGAC**caacagtgcggccccagggttcgtccc**CAGAC** (-541/-484)

g**TGCCTTGACTgaGCTTCT**cg**CTTC**caacagtgcggccccagggttcgtccc**TCTGCT**

**SUPPLEMENTARY FIG. S4.** NKX2-1 promoter and putative SMAD binding elements (SBEs). This region contains 1599 bp, from -1595 to +4 relative to the transcription start site of NKX2-1. Bold: transcription start site. Red letters for mutated nucleotide residues. Putative SBEs, including a consensus sequence [C]AGAC in capitals.
