# Supplementary material
Source: PubMed Central journal article supplement (PMC3629846)
Supplement: Supp_Table1.pdf [file Supp_Table1.pdf]

| <b>primer</b>           | <b>sequence</b>          |                 |                                  |                 |                                        |
|-------------------------|--------------------------|-----------------|----------------------------------|-----------------|----------------------------------------|
| GAPDH-F                 | TGGTATCGTGGAAGGACTCATGAC |                 |                                  |                 |                                        |
| GAPDH-R                 | ATGCCAGTGAGCTTCCCGTTCAGC |                 |                                  |                 |                                        |
| OCT3A -F                | GATGGCGTACTGTGGGCC       |                 |                                  |                 |                                        |
| OCT3A-R                 | TGGGACTCCTCCGGGTTTTG     |                 |                                  |                 |                                        |
| hBrach-F                | AATTGGTCCAGCCTTGAAT      |                 |                                  |                 |                                        |
| hBrach-R                | ACAGGCTGGGGTACTGACTG     |                 |                                  |                 |                                        |
| FOXA2-F                 | ATTGCTGGTTCGTTTGTGTG     |                 |                                  |                 |                                        |
| FOXA2-R                 | TACGTGTTTCATGCCGTTTCAT   |                 |                                  |                 |                                        |
| hGsc-F                  | TCTCAACCAGCTGCACTGTC     |                 |                                  |                 |                                        |
| hGsc-R                  | CCAGACCTCCACTTTCTCCTC    |                 |                                  |                 |                                        |
| hSox17-F                | CGCACGGAATTTGAACAGTA     |                 |                                  |                 |                                        |
| hSox17-R                | GGATCAGGGACCTGTCACAC     |                 |                                  |                 |                                        |
| Eomes-F                 | AACAACACCCAGATGATAGTC    |                 |                                  |                 |                                        |
| Eomes-R                 | TCATAGTTGTCTCTGAAGCCT    |                 |                                  |                 |                                        |
| GATA6-F                 | GCTCTACAGCAAGATGAACG     |                 |                                  |                 |                                        |
| GATA6-R                 | TGCTATTACCAGAGCAAGTC     |                 |                                  |                 |                                        |
| NKX2.1-F                | ACCAGGACACCATGAGGAAC     |                 |                                  |                 |                                        |
| NKX2.1-R                | CGCCGACAGGTACTIONTCTGTT  |                 |                                  |                 |                                        |
| PAX9-F                  | GGCTCCTTGATGAGAAGGTG     |                 |                                  |                 |                                        |
| PAX9-R                  | CCTTCCGCTGTCTCTTTCAG     |                 |                                  |                 |                                        |
| PAX8-F                  | CTTGGCAGGTACTIONACGAGAC  |                 |                                  |                 |                                        |
| PAX8-R                  | GCAAACATGGTAGGGTTCTG     |                 |                                  |                 |                                        |
|                         |                          |                 |                                  |                 |                                        |
|                         |                          |                 |                                  |                 |                                        |
| <b>Primary Antibody</b> | <b>original</b>          | <b>dilution</b> | <b>2<sup>nd</sup> antibody</b>   | <b>dilution</b> | <b>Isotype</b>                         |
| Oct 3/4                 | Gt-Santa Cruze-SC-8638   | 1;200           | Donkey anti goat Alexa 555(red)  | 1;500           | Goat IgG-Jachson labs-JACK005-000-0020 |
| FOXA2                   | Gt-Santa Cruze-SC-6554   | 1;200           |                                  |                 |                                        |
| NKX2-1                  | Rb-MAB Ab 76013-EP-1585Y | 1;200           | Donkey anti goat Alexa 488(blue) | 1;500           | Rb IgG-BD pharmingen                   |
| GATA6                   | Gt-R&D-AF1700            | 1;200           | Donkey anti goat Alexa 555(red)  | 1;500           | Goat IgG-Jachson labs-JACK005-000-0020 |
| PAX9                    | Rat-Abcam-ab2858         | 1;200           | Goat anti rat Alexa 555(red)     | 1;500           | Rat IgG-BD pharmingen                  |
| Hoechst                 | Sigma-33258              | 1;2000          |                                  |                 |                                        |
